# Supplementary material for: A comprehensive rock glacier inventory for Jammu, Kashmir, and Ladakh, western Himalaya, India – Baseline for the permafrost research
Source: Copernicus journal article supplement (doi:10.5194/essd-2023-522), 2024-02-05
Supplement: Supplementary file 1 [file essd-2023-522-supplement.pdf]

*Supplement of*

**A comprehensive rock glacier inventory for Jammu, Kashmir, and Ladakh, western Himalaya, India - Baseline for the permafrost research**

**Bhat et al.**

*Correspondence to:* Irfan Rashid ([irfangis@kashmiruniversity.ac.in](mailto:irfangis@kashmiruniversity.ac.in))

**Table S1.** GIS experts involved in digitizing rock glacier outlines

| <b>S. No.</b> | <b>Name</b>              | <b>Affiliation</b>                                                                                  |
|---------------|--------------------------|-----------------------------------------------------------------------------------------------------|
| 1.            | Dr. Irfan Rashid         | Senior Assistant Professor,<br>Department of Geoinformatics,<br>University of Kashmir.              |
| 2.            | Dr. Saurabh Vijay        | Assistant Professor,<br>Department of Civil Engineering,<br>Indian Institute of Technology Roorkee. |
| 2.            | Ms. Seerat Magray        | PhD student,<br>Department of Geoinformatics,<br>University of Kashmir.                             |
| 3.            | Ms. Aneaus Sheikh        | PhD student,<br>Department of Geoinformatics,<br>University of Kashmir.                             |
| 4.            | Mr. Nadeem Ahmad Najar   | PhD student,<br>Department of Geoinformatics,<br>University of Kashmir.                             |
| 5.            | Mr. Danish Rafiq Kashani | PhD student,<br>Department of Geoinformatics,<br>University of Kashmir.                             |
| 6.            | Mr. Faisal Zahoor Jan    | PhD student,<br>Department of Geoinformatics,<br>University of Kashmir.                             |

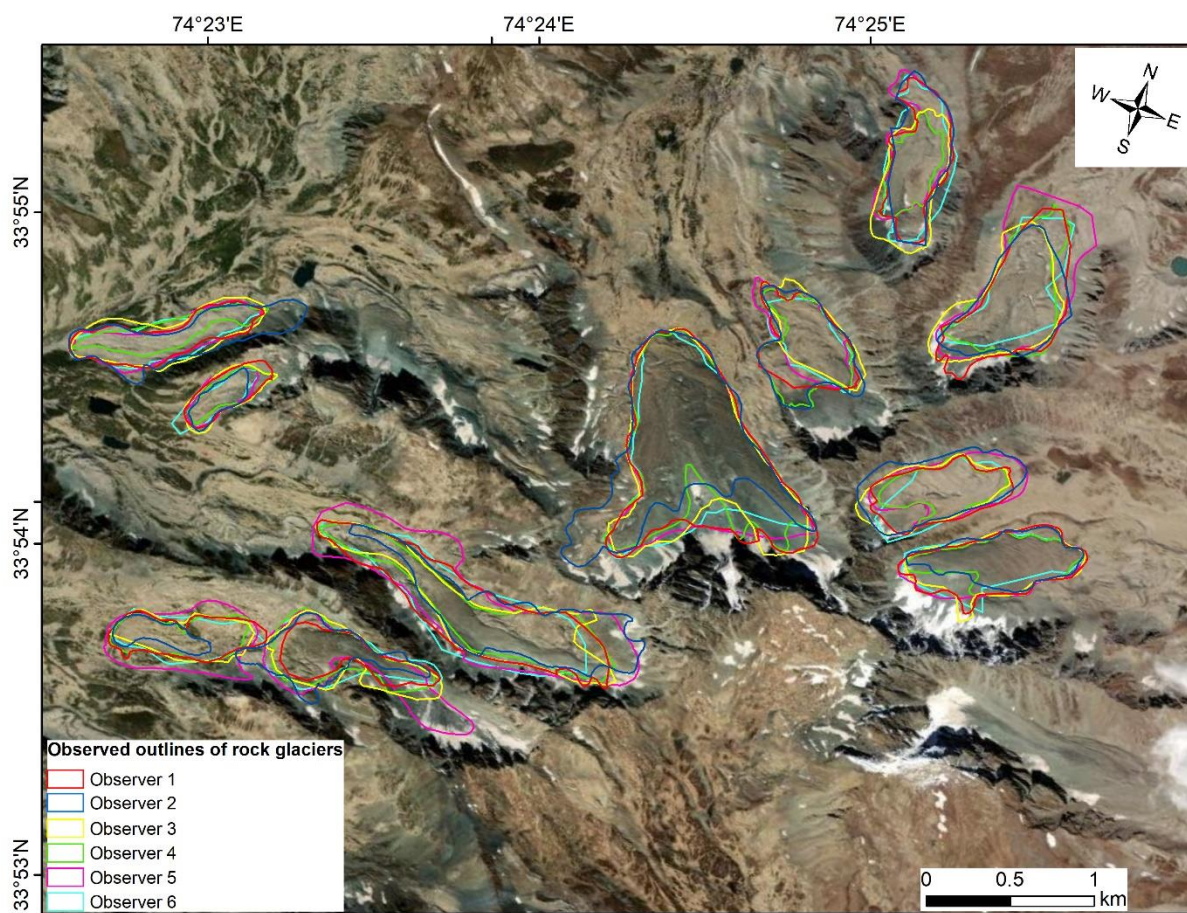

**Figure S1.** Sample of rock glacier outlines delineated by various GIS experts. Satellite image credits: ESRI Basemap, ArcMap 10.1.

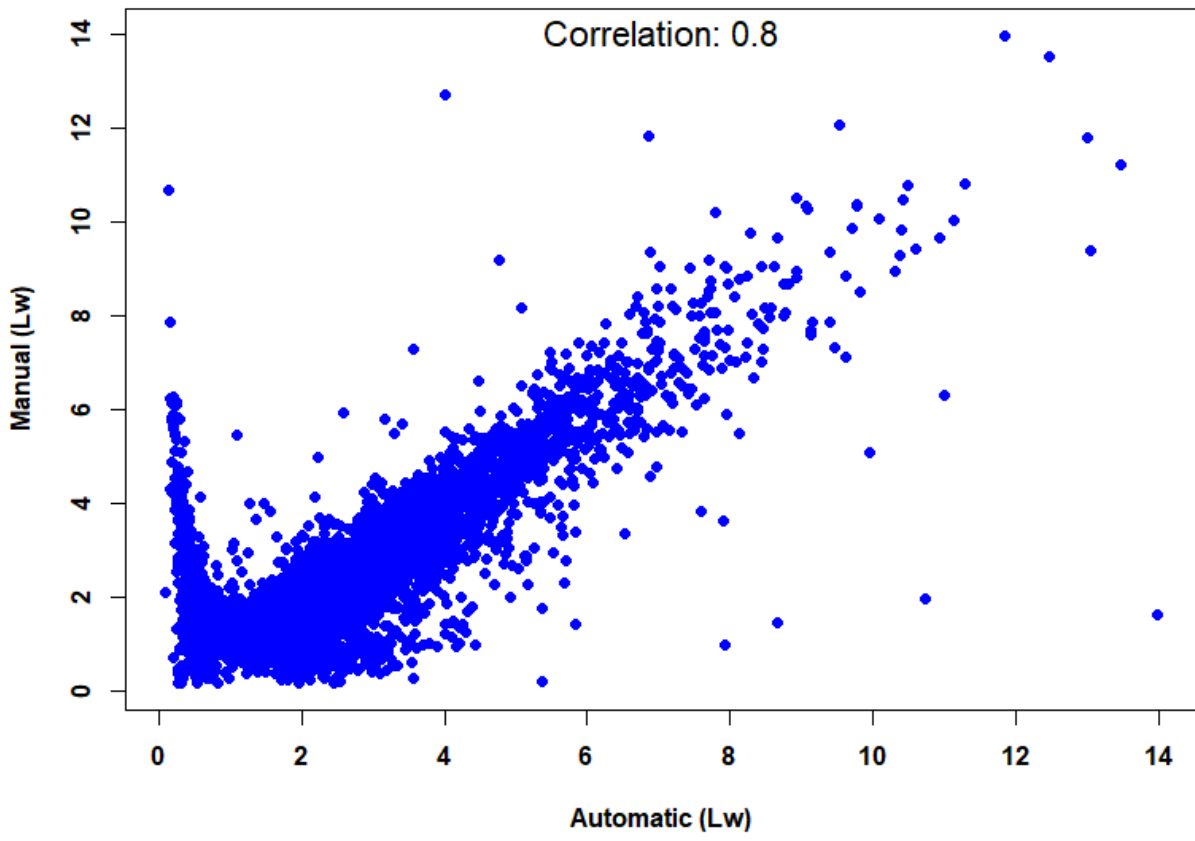

**Figure S2.** Correlation between automatic and manual Lw of rock glaciers in the study area.

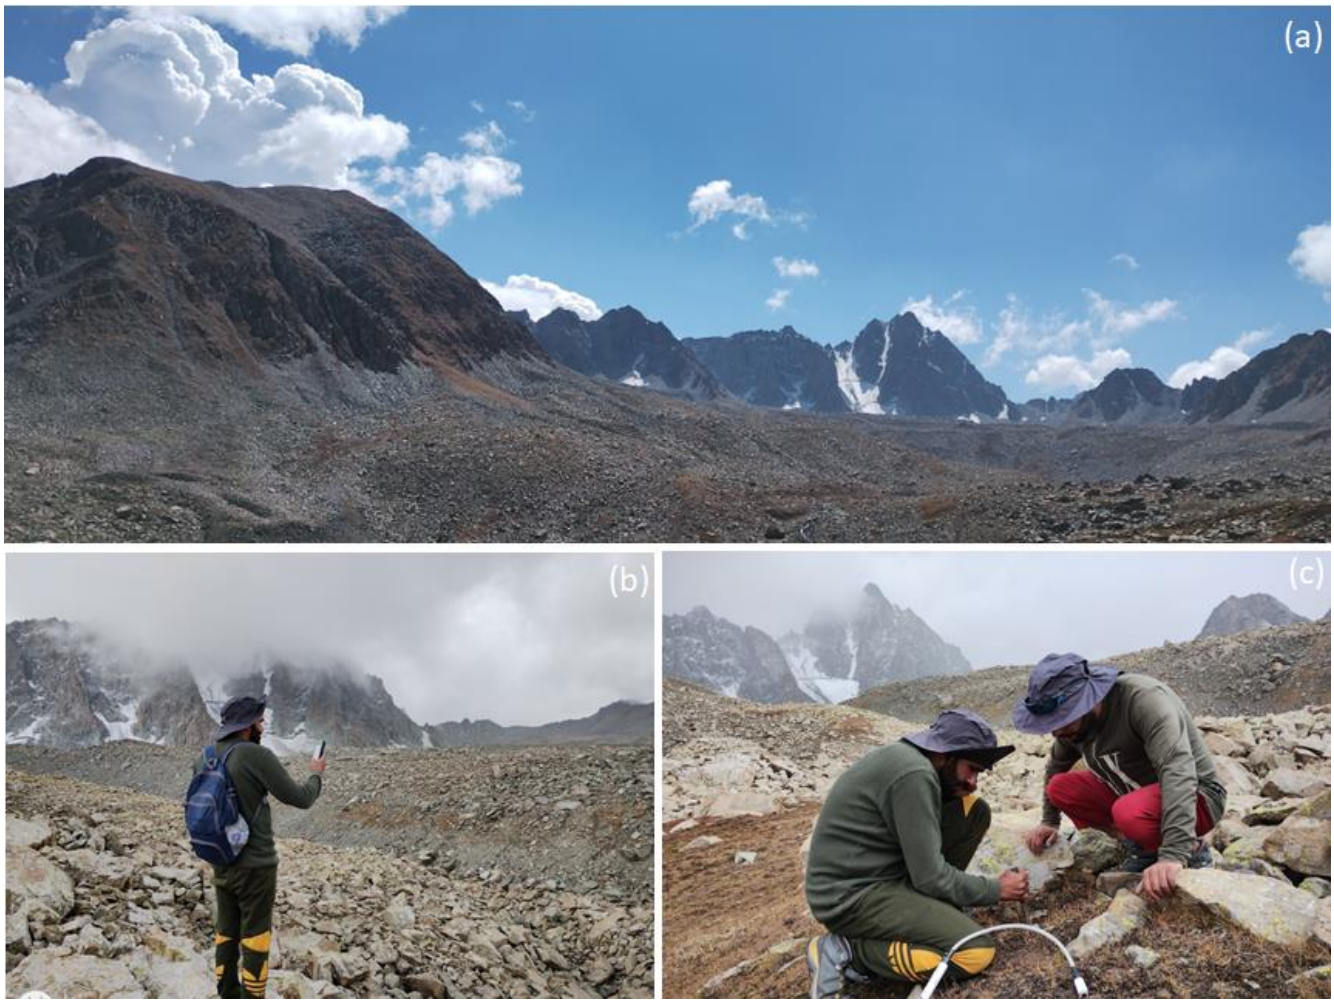

**Figure S3.** Field photographs of rock glaciers in the Pir Panjal Range: (a) A panoramic view showcasing rock glaciers with RGID (RGU339166N744153E, RGU339244N744189E, RGU339410N744018E, RGU339350N744211E, RGU339293N744283E, RGU339189N744282E), (b) Collecting GPS readings at the toe of the rock glacier, and (c) Installation of ground surface temperature data logger for collecting temperature data in the permafrost landscape
