# Supplementary material for: A comprehensive rock glacier inventory for Jammu, Kashmir, and Ladakh, western Himalaya, India – Baseline for the permafrost research
Source: Copernicus journal article supplement (doi:10.5194/essd-2023-522), 2024-02-05
Supplement: Supplementary file [file essd-2023-522-RC1-supplement.pdf]

# A comprehensive rock glacier inventory for Jammu, Kashmir, and Ladakh, western Himalaya, India - Baseline for the permafrost research

5 Imtiyaz Ahmad Bhat<sup>1</sup>, Irfan Rashid<sup>1, \*</sup>, RAAJ Ramsankaran<sup>2</sup>, Argha Banerjee<sup>3</sup>, Saurabh Vijay<sup>4</sup>

<sup>1</sup>Department of Geoinformatics, University of Kashmir, Srinagar, 190006, India

<sup>2</sup>Department of Civil Engineering, Indian Institute of Technology Bombay, Mumbai, 400076, India

<sup>3</sup>Earth and Climate Science, Indian Institute of Science Education and Research Pune, Pune, 411008, India

10 <sup>4</sup>Department of Civil Engineering, Indian Institute of Technology Roorkee, Roorkee, 247667, India

\*Correspondence to: Irfan Rashid ([irfangis@kashmiruniversity.ac.in](mailto:irfangis@kashmiruniversity.ac.in))

**Abstract.** The prevalent climate warming across the mountain regions worldwide has exacerbated the snow melt, glacier recession and permafrost thawing that is impacting the hydrological cycle. The rock glaciers, a manifestation of ice-rich permafrost, could be regionally important for sustaining the streamflow, especially in the lean season in the Himalaya. Several rock glacier inventories have been developed for high-mountain areas worldwide. However, there are sporadic studies that have characterized rock glaciers in the Himalaya. In this study, a comprehensive rock glacier inventory has been generated for the western Himalayan regions of Jammu-Kashmir and trans-Himalayan Ladakh spread over six mountain ranges utilizing optical satellite images from Google Earth and Sentinel 2A. The inventory has characterized each rock glacier with 22 attributes following the guidelines of the International Permafrost Association (IPA). The inventory contains 5492 rock glaciers (4973 intact and 519 relict) with a total area of 573 km<sup>2</sup> and an average area of 0.1 km<sup>2</sup>. The highest number of rock glaciers (n=1772) were found in the Zaskar range and the lowest (n=311) were found in the Pir Panjal range. The majority of rock glaciers (~83%) have a talus origin, and the remaining ~17% have a glacier origin. The inventory reports 4756 tongue-shaped and 736 lobate rock glaciers. The average Potential Incoming Solar Radiation (PISR) was observed to be 511 (kWh m<sup>-2</sup>). The rock glaciers are located between the elevation range of 3301 m asl and 5605 m asl with 63% of these having a north- or north-east- or northwest-facing aspect. The Mean Annual Air Temperature (MAAT) and precipitation of the rock glaciers range from -8 °C to 8 °C (mean -4 °C) and 71 mm to 1135 mm (mean 328 mm), respectively. The rock glacier inventory provides direct evidence of the presence of permafrost in this ecologically sensitive region and provides a lower bound on the elevation of the permafrost. This inventory shall serve as a baseline for the future hydrological impacts of permafrost and its response to regional climate change. The rock glacier inventory is publicly available at <https://doi.org/10.5281/zenodo.10559297> (Bhat et al., 2024).

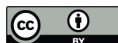

## 1. Introduction

Permafrost, the ground that remains at a temperature of 0 °C or below for at least two consecutive years, is an important component of the cryosphere (Dobiński, 2020; Jafarov et al., 2012; Romanovsky et al., 2010). It is tightly coupled with Earth's surface energy balance, and any change in this relationship can have serious implications for gaseous exchange and geomorphological processes (Stiegler et al., 2016; Stuenzi et al., 2021). Permafrost is a subsurface phenomenon and may not always be visible on the surface. However, rock glaciers, thermokarst characteristics, frost heave, patterned ground, and other traits indicate the presence of permafrost in various environments (Karlsson et al., 2012).

Rock glaciers, an important subset of permafrost, are cryo-conditioned landscapes or flowing bodies of coarse talus and the granular regolith with interstitial ice (Berthling and Etzelmüller, 2011). Morphologically, rock glaciers are lobate or tongue-shaped bodies with surface features, such as furrows, swales, and ridges, and show movement from a few centimetres to meters per year downslope by gravity-induced creep (Kääb et al., 2021; Groh et al., 2019). These are important components of high mountain systems and act as direct proxies and visual indicators of mountain permafrost (Barsch, 1996; Berthling and Etzelmüller, 2011; Haeberli, 1985). Rock glaciers define the lower limit of mountain permafrost in terms of the elevational distribution of landforms in glacial and periglacial environments (Haeberli et al., 2006; Lilleøren et al., 2013). The present or past climate plays an important role in the formation of rock glaciers, and their existence has been attributed to the continental climate (Haeberli, 1985). Consequently, rock glaciers are climatically and hydrologically important, contain valuable amounts of water (Bolch and Marchenko, 2009; Brighenti et al., 2021; Jones et al., 2018, 2021), and act as potential water reservoirs, particularly in semi-arid and arid mountains (Azócar and Brenning, 2010; Rangescroft et al., 2014). With anticipated climate change and warming temperatures, rock glaciers are expected to play a significant role in sustaining constant streamflow in the affected areas (Janke et al., 2015). Rock glaciers are classified as intact or relict: lack of vegetation on the surface, negative mean annual surface temperature (MAST), and increasing velocity distinguish intact rock glaciers from relict rock glaciers (Barsch, 2012; Ikeda and Matsuoka, 2002; Kofler et al., 2020). The rock glaciers are characterised by a 0.5 to 5 m thick, seasonally frozen active layer of clastic-blocky material (Jones, 2020). This active layer creates an insulating effect and slows the rate of ice melt within the rock glacier, thus thermally decoupling it from external micro- and meso-climates (Jones et al., 2019). Warming and thawing of rock glaciers due to increased temperatures can lead to thinning of the active layer and has the potential to change the sediment transfer systems, thus altering the frequency and magnitude of natural hazards, such as rock avalanches and debris flows (Beniston et al., 2018; Delaloye et al., 2013; Schmid et al., 2015a; Schoeneich et al., 2015). These mass movements have the potential to cause lake outbursts (Allen et al., 2009; Haeberli, 2013; Kääb, 2008). This also has the potential to change the land use and land cover (LULC) of these areas because LULC is connected to the presence of a water table perched on permafrost (Pandey et al., 2022).

Comprehensive research has been conducted to understand the spatial distribution of glaciers and snowfields in the western Himalayan region (Frey et al., 2012; Kulkarni et al., 2010). Conversely, very little research effort has been made to map and



65 monitor the permafrost extent and spatial distribution of rock glaciers in the Himalayan region, particularly in the Western Himalaya. Information regarding the spatial distribution of rock glaciers and mountain permafrost could be an essential approach for paleoclimatic modelling (Colucci et al., 2016; Duguay et al., 2015). Therefore, it is necessary to understand the distribution and occurrence of these phenomena at a regional scale for targeted risk assessment and land-use planning (Haerberli et al., 2010).

70 The identification and compilation of rock glacier inventories using automated methods is challenging (Millar and Westfall, 2008). The complex terrain and varied topographic characteristics of rock glaciers make it difficult to develop a universal algorithm that can accurately map them in different mountain ranges with varying topography (Millar and Westfall, 2008). However, rock glaciers can be easily detected from high-resolution satellite images and used as first-order approximations for mapping and defining the distribution of mountain permafrost (Buckel et al., 2022). Several studies have been conducted on  
75 permafrost and rock glaciers in the Himalayan region (Khan et al., 2021; Schmid et al., 2015; Pandey et al., 2022). These studies have been sporadic, geographically dispersed, and limited in terms of long-term measurements and evidence of rock glaciers (Gruber et al., 2017).

Rock glacier inventories have been compiled for various mountain ranges across the world. For example, inventories exist in the European Alps (Kellerer-Pirklbauer et al., 2012; Krainer and Ribis, 2012), Andes (Falaschi et al., 2015; Rangecroft et al.,  
80 2014), Rockies (Janke, 2007; Liu et al., 2013), and Hindukush Himalaya (Baral et al., 2020; Haq and Baral, 2019a; Hassan et al., 2021; Jones et al., 2018; Pandey, 2019). Therefore, the current study attempts to create an inventory of rock glaciers in the Himalayan and trans-Himalayan regions of Jammu-Kashmir and Ladakh, respectively. This investigation will be the first step in determining the distribution of rock glaciers in this ecologically fragile area. Moreover, it can help assess potential risks, such as rockfalls, landslides, and slope instability associated with permafrost degradation. These considerations hold utmost  
85 significance in guiding land utilisation strategies and the strategic development of infrastructure, which could ultimately contribute to the long-term wellness of the environment and local population.

## 2. Data and methods

### 2.1 Study area

90 The geographic domain of analysis, comprising of Jammu-Kashmir and trans-Himalayan Ladakh, which constitute the northwestern part of the Himalaya, is situated between  $32^{\circ} 28' - 37^{\circ} 06'$  latitude and  $72^{\circ} 53' - 80^{\circ} 32'$  longitude at an altitudinal range of 220 - 8611 m asl (Fig. 1).

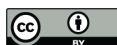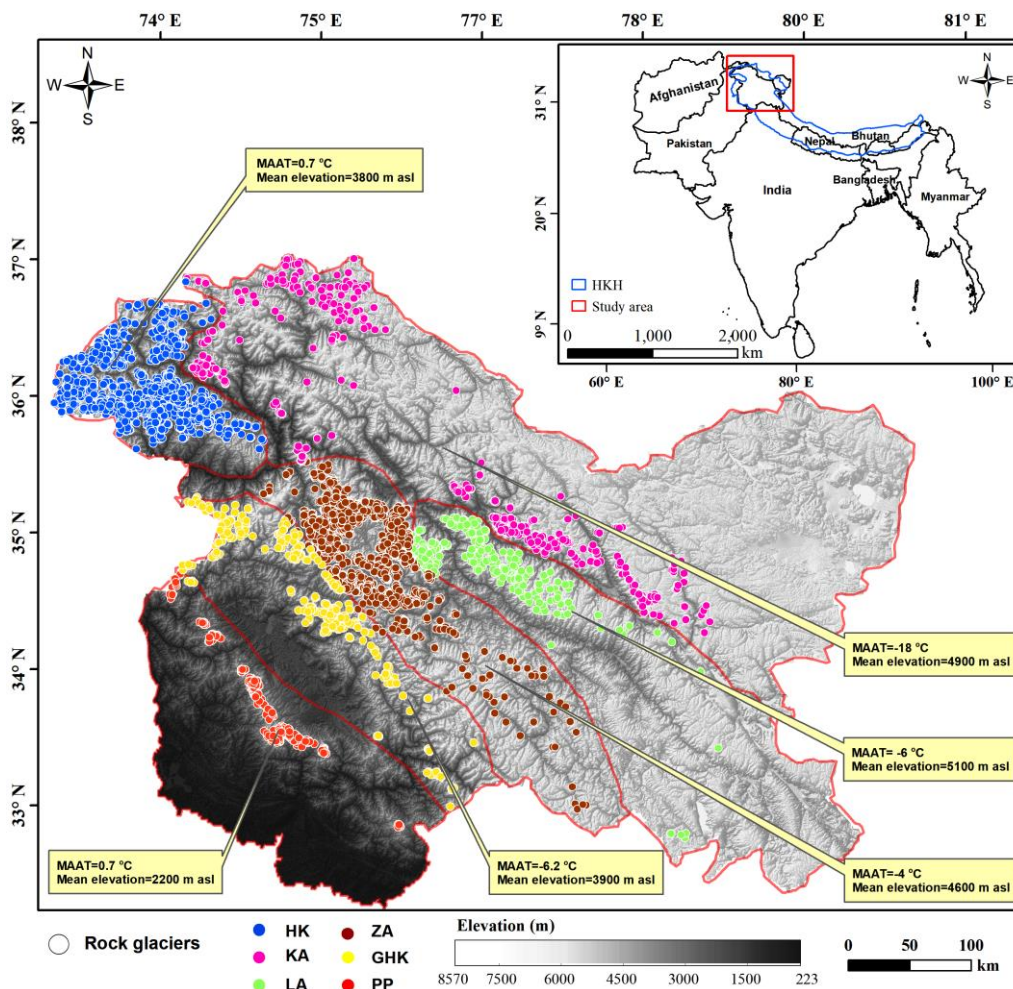

**Figure 1.** Depicts the study area and emphasizes the different mountain ranges and their climatic and topographic characteristics  
 95 **Hindukush (HK), Karakoram (KA), Ladakh (LA), Zanskar (ZA), Greater Himalaya of Kashmir (GH) and Pir Panjal (PP)**

The study area is spread over 2,22,236 km<sup>2</sup> and is divided into three physiographic regions, Jammu, Kashmir, and Ladakh, with ~80% of the total area comprising mountains (Gupta, 2018). Approximately 75% of the study area falls under the alpine zone (>3300 m asl) while 25% of the area falls under the subalpine zone (Rathore et al., 2020). In this study, rock glacier mapping was carried out above 3300 m asl elevation since this region is periglacial hosting 11436 glaciers (Bajracharya, 2011) with favourable environmental, topographic, and climatic conditions for permafrost occurrence. Meltwater from these glaciers and permafrost acts as the main source of water for rivers and streams in the region (Thayyen and Gergan, 2010). Geomorphic and climatic factors including cold, humid, and dry climates have a significant impact on the formation of these landscapes. Due to the location of part of this area in subtropical latitudes and small-scale altitudinal variation of relief, the climate found in most parts is similar to that of mountainous and continental temperate latitudes (Humlum, 1998). The climate type ranges



105 from the cold, arid, and dry desert region of Ladakh in the north, the temperate zone of the Kashmir valley in the middle, and  
hot plains of Jammu in the south (Jee, 2020). The mountainous northern and central parts of this region receive annual  
precipitation in the form of rain and snow, whereas the southern plains receive precipitation from the monsoonal rain (Romshoo  
et al., 2020). This region has a highly heterogeneous lithology and contains some of the finest developments in stratigraphic  
succession from the Archaean Era to the present (Dhang, 2016).

### 110 2.1.1 Datasets used

Currently, a lot of research literature is available that focuses on the automatic and semi-automated mapping of glaciers from  
satellite imagery (Baraka et al., 2020; Kaushik et al., 2019); however, these approaches make it difficult to map rock glaciers  
and debris-covered glaciers, because the debris cover that originates from surrounding valley rock results in the loss of  
distinctiveness in spectral signatures (Brenning, 2009). Therefore, the present rock glacier inventory was compiled by using  
the widely employed manual digitization from freely available Google Earth (version 7.3.4.8642). It is pertinent to mention  
that Google Earth imagery has been used in various previous studies (Majeed et al., 2022; Pandey, 2019; Schmid et al., 2015b)  
to compile rock glacier inventories. Google Earth provides multitemporal satellite data from the early 1990s, which provides  
an opportunity to obtain cloud-free, snow-free, and shadow-free images, thereby reducing the ambiguity (Johnson et al., 2021).  
Google Earth uses high-resolution SPOT images or digital globe products, such as IKONOS and Quick Bird, and provides  
several tools for the creation of databases and delineating features (points, lines, and polygons). Additionally, it supports the  
creation of shapefiles which can be exported as Keyhole Markup Language (KML) for further analysis in various GIS-based  
software. However, Google Earth imagery has limited temporal coverage for certain areas which limits the data selection.  
Sentinel-2A images with a ten-day revisit time and 10 m spatial resolution were used to address this issue. Sentinel-2A provides  
both the spectral and spatial details of the landscape and has been previously used in various cryosphere studies; however, it  
has rarely been employed in permafrost or rock glacier studies (Haq and Baral, 2019b). Therefore, cloud-free Sentinel-2A  
images of the summer months (usually snow-free periods) were used to delineate and validate the rock glacier inventory.  
Sentinel-2A imagery was downloaded from the Copernicus Scientific Data Hub website as a Level 1C product. The validation  
process of rock glaciers extracted from Google Earth imagery, as well as the subsequent manual digitisation of the remaining  
rock glaciers, was performed using ArcGIS 10.1 software.

### 130 2.1.2 Identification and classification of rock glaciers

The study area comprises a vast geographic expanse which presents a significant challenge to exhaustive mapping of rock  
glaciers. Rock glacier mapping is a subjective approach that relies heavily on the identification of geomorphic characteristics  
unique to these features, such as ridge and furrow topography, steepness of frontal and lateral slopes, swollen ground, and  
distinct textures (Roer and Nyenhuis, 2007) (Fig. 2). A thorough and comprehensive literature review was conducted to  
critically evaluate the previous studies on this topic (Table 1). In this study, the methodology of Jones et al. (2018) and IPA

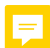

(Delaloye et al., 2018) was adopted, which offers a solid and organized framework for the analysis of rock glaciers. The methodology enhances the reliability of findings and promoting consistency to address subjectivity-related identification and classification issues of rock glaciers. The 1 km grid was created on the entire study area in ArcMap 10.1 using the ‘*create fishnet*’ tool. The fishnet was then overlaid on Google Earth and each grid cell was visually inspected on an individual basis.

140 A scale of 1:2000 or better was used for the identification of rock glaciers, and the perimeter was delineated manually for each candidate on Google Earth. The nature of rock glaciers makes the delineated boundaries inherently uncertain. While this is an unavoidable problem, we performed a thorough analysis of the uncertainty involved, which is presented in section 2.1.4.

A total of 22 attributes were calculated for each rock glacier to provide quantitative information for further analysis and comparison of the inventory (Table 1). The rock glacier unit ID (RGUID) for each rock glacier was assigned automatically according to IPA guidelines. The RGUID consists of RGU (Rock Glacier Unit) followed by 12 to 15 digits, determined by the latitude and longitude values, with four digits consistently appearing after the degrees. The area of the rock glaciers was calculated in square kilometres using ArcMap10.1. Based on the extent of activity, the mapped rock glaciers were classified as intact or relict (Fig. 3). Intact rock glaciers contain active and inactive rock glaciers which are differentiated based on their ice content, variations in movement, and sedimentary contributions (Baral et al., 2020; Lilleøren and Etzelmüller, 2011).  
145 Because our mapping effort relied exclusively on visual inspection, distinguishing these features from visual cues is challenging. Therefore, following Scotti et al. (2013) active and inactive rock glaciers were placed under the intact group.

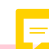

**Table 1. Comprehensive review and evaluation of previous rock glacier inventories across different mountain ranges of the world**

| Region             | Number of rock glaciers | Elevation range | Reference             |
|--------------------|-------------------------|-----------------|-----------------------|
| Hindukush Himalaya | 702                     | 3500- 5500      | Schmid et al. (2015)  |
| Himachal Pradesh   | 516                     | 3052-5503       | Panday (2022)         |
| Uttarakhand        | 1004                    | >4000           | Baral et al. (2020)   |
| Nepal Himalaya     | 6000                    | 3225-5675       | Jones et al. (2018)   |
| Central Himalaya   | 370                     | 4000-6000       | Rastner et al. (2021) |
| Jhelum basin       | 231                     | 3019-4633       | Majeed et al. (2022)  |
| Arid West Kunlun   | 413                     | 3389-5541       | Hu et al. (2023)      |
| Hunza Basin        | 616                     | 2800-5700       | Hassan et al. (2021)  |
| Daxue Shan         | 344                     | 3860-5094       | Cai et al. (2021)     |
| Alaknanda Valley   | 198                     | 4270-5200       | Pandey et al. (2022)  |
| Sikkim             | 185                     | 2341-7878       | Haq and Baral (2019)  |
| Guokalariju        | 5053                    | 4800-5400       | Li et al. (2022)      |

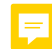

155 Furthermore, the rock glaciers were classified as talus-derived or glacier-derived based on their source of sedimentary material (Fig. 4). Rock glaciers with source material talus slopes are classified as talus-derived, whereas rock glaciers with source material glacier moraine and glacial ice with associated sedimentary material are classified as glacier-derived (Humlum, 2000; Scotti et al., 2013).

160 The rock glaciers were classified as tongue-shaped or lobate based on their length-to-width ratio ( $L_w$ ). Rock glaciers with  $L_w < 1$  were classified as lobate, whereas those with  $L_w \geq 1$  were classified as tongue-shaped.  $L_w$  was calculated both automatically and manually. In the automated method the length of rock glacier was calculated based on the maximum and minimum coordinates in both the X and Y dimensions and width were determined by the taking the ratio of area ( $A$ ) to the length ( $L$ ). In the manual method the length and width were calculated using the ‘*Measure*’ tool in ArcGIS 10.1, the length in the direction of flow and width perpendicular to length (Fig. 5). However, the manual approach has been found to be the more robust method and was hence adopted in this study. When employing the automatic approach, it was revealed that 60 rock glaciers showed varying results compared to the manual approach (Fig. S1). A manual re-evaluation revealed that the manual approach produced more accurate results. For automatic calculations, the following equations were established using R programming:

$$L = \sqrt{(X_{max} - X_{min})^2 + (Y_{max} - Y_{min})^2} \quad \dots(1)$$

170 where  $X_{max}$  and  $X_{min}$  respectively represent the highest and lowest x-coordinate of the rock glacier, and  $Y_{max}$  and  $Y_{min}$  respectively represent the highest and lowest y-coordinate of the rock glacier.

$$W = A/L \quad \dots(2)$$

where  $W$  represents the width of a rock glacier

$$L_w = L/W \quad \dots(3)$$

### 2.1.3 Extraction of topoclimatic parameters

175 The freely distributed Copernicus digital elevation model (GLO-30), with a spatial resolution of 30 m, was used for the analysis of topographic parameters. The topographic parameters of elevation, slope, and majority aspect, were calculated by using the raster functions in ArcGIS10.1 “*Spatial Analyst*” tool. Further, the GLO-30 DEM was also used for the determination of PISR using the tool “*Area Solar Radiation*”. The concept of Sattler et al. (2016) was adopted, and the snow-free period from July to September was selected for PISR. PISR values were calculated in kilowatt-hours per square meter ( $\text{kWh m}^{-2}$ ). The climatic characteristics of rock glaciers that include MAAT and precipitation were extracted from WorldClim version 2.1 climate data (Fick and Hijmans, 2017).

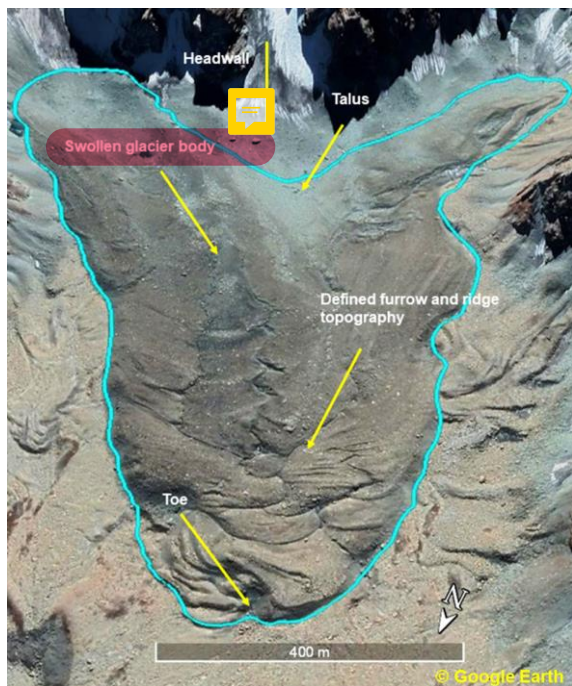

**Figure 2.** Illustrates the unique surface characteristics of rock glacier and challenges for identifying the boundary upper and lower end of the rock glacier due to its irregular flow patterns and adjacent landforms.

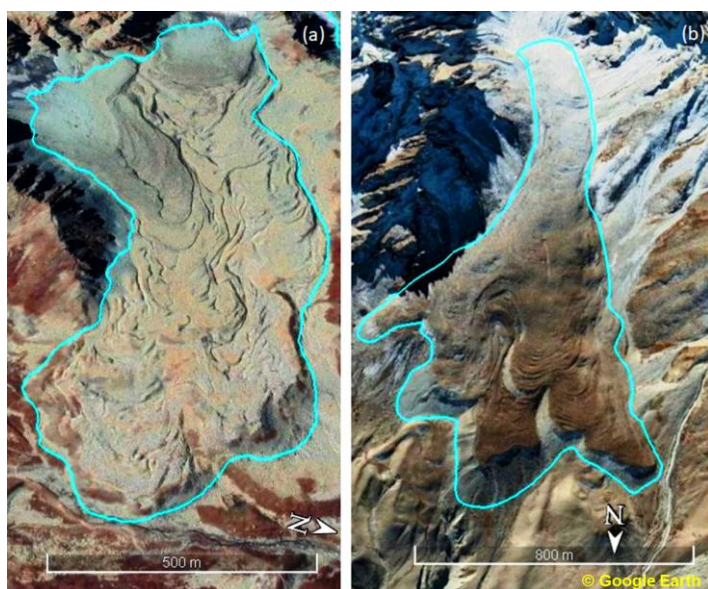

185

**Figure 3.** Visual representation of two types of the rock glaciers. (a) Intact rock glacier with RGID-RGU339410N744018E, (b) rock glacier with RGID-RGU351133N763472E.



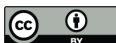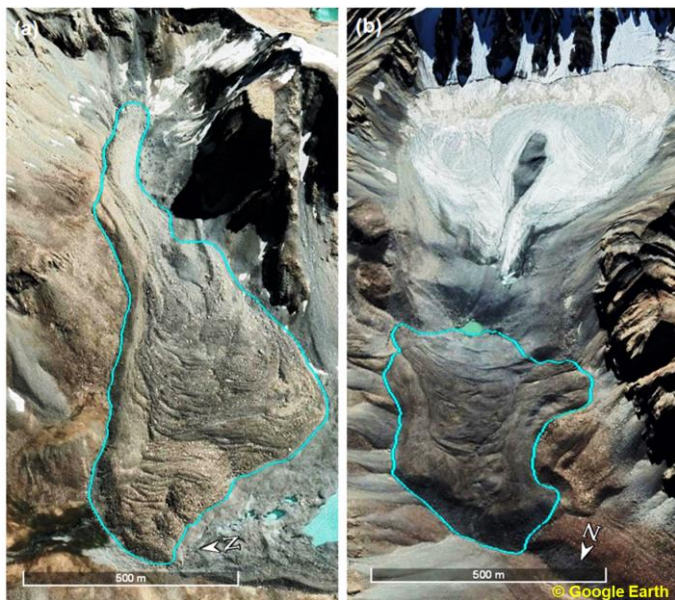

190 **Figure 4. Classification of rock glaciers based on source (a) Talus-derived with RGID RGU359030N730756E (b) Glacier-derived with RGID RGU359681N730191E. Satellite image credits: Google Earth.**

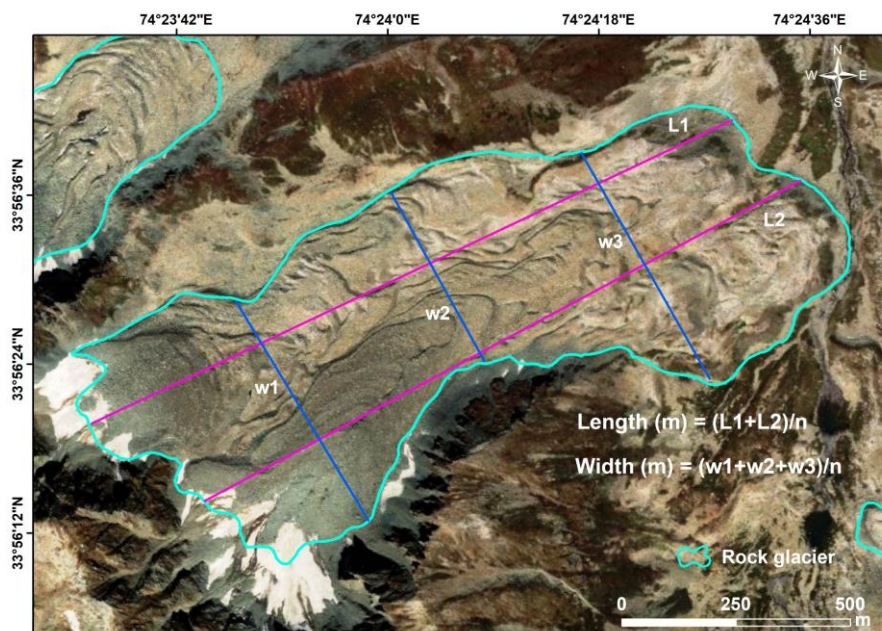

**Figure 5. A conceptual representation of computing  $Lw$  for each rock glacier in ArcMap 10.1 by considering average measurements of two lengths and three widths. Satellite image credits: ESRI Basemap, ArcMap 10.1.**



## 2.1.4 Uncertainty Analysis

195 Accurately identifying the upper and lower boundaries of rock glaciers poses a significant challenge due to irregular surface  
morphology, variable flow dynamics and gradual transitions with surrounding terrain (Fig. 2). These challenges underscore  
the need for more comprehensive approaches to identify the rock glacier boundaries precisely (Pandey; 2019). In this study a  
robust approach was employed to quantify the uncertainty associated with the cognitive aspects of delineating rock glacier  
inventory outlines. This approach allowed us to capture potential variations and subjectivity in delineating the extent of rock  
200 glaciers. To achieve this, we selected a representative dataset comprising 20 rock glaciers and distributed their centroids among  
6 proficient remote sensing experts with glacier mapping experience to delineate rock glacier extents to account for cognitive  
error in our mapping (Table. S1).

The following equations were employed for the calculation of cognition and digitisation errors:

$$\varepsilon_c = \frac{\sigma}{\mu} \times 100 \quad \dots(4)$$

205 where  $\varepsilon_c$  is the cognition error,  $\sigma$  is the standard deviation in area, and  $\mu$  is the mean area.

$$\varepsilon_d = n \times \frac{\lambda^2}{2} \quad \dots(5)$$

where  $\varepsilon_d$  is the digitisation error,  $n$  is the number of pixels on which the rock glacier outline falls, and  $\lambda$  is the spatial resolution  
of the data.

The total error ( $\varepsilon_t$ ) was calculated by adding the cognitive error and digitisation error as:

$$210 \quad \varepsilon_t = (\varepsilon_c + \varepsilon_d) \quad \dots(6)$$

## 3 Results

### 3.1 Overall distribution

We identified 5492 rock glaciers distributed across different mountain ranges in the study area. The identified rock glaciers  
215 comprise 4973 intact rock glaciers and 519 relict rock glaciers covering an area of 573 km<sup>2</sup> (average=0.10 km<sup>2</sup>). A total of  
4582 rock glaciers (83%) have talus origin, while the remaining 910 rock glaciers (17%) have glacier origin. The  $L_w$  of 4756  
rock glaciers is greater than 1 and classified as tongue-shaped, while the  $L_w$  of 736 rock glaciers was found to be less than 1  
and classified as lobate type. Topographically, the rock glaciers are located between elevations of 3300 m asl and 5605 m asl  
(average = 4476 m asl), with an average slope of 15.79. Climatically the Mean Annual Air Temperature (MAAT) and

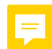

220 precipitation of the rock glaciers were ranging from  $-8^{\circ}\text{C}$  to  $8^{\circ}\text{C}$  (mean  $-4^{\circ}\text{C}$ ) and 71 mm to 1135 mm (mean 328 mm),  
respectively. The analysis reports that the highest and lowest values of PISR for rock glaciers are  $748\text{ kWh m}^{-2}$  and  $0.0014$   
 $\text{kWh m}^{-2}$  respectively, with an average of  $511\text{ kWh m}^{-2}$ . The study further revealed that the overall aspect of rock glaciers is  
predominantly north facing. Overall,  $\sim 64\%$  (3500) of rock glaciers have a north-facing aspect, with 30% (1673) facing north,  
17% (937) northwest, and 16% (890) northeast. On contrary, 36% (1992) of rock glaciers exhibit a non-northerly orientation,  
225 among which 5% (254) face southeast, followed by 6% (345) east, 10% (581) west, 7% (363) south, and 8% (449) southwest.

### 3.1.1 Range-wise distribution

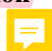

The largest number of rock glaciers were found in the ZA range and the lowest in the PP range. The decreasing order of rock  
glaciers in different mountain ranges is  $\text{ZA} > \text{HK} > \text{LA} > \text{KA} > \text{GH} > \text{PP}$ . The precipitation followed increasing trend from north to  
south: LH (192 mm) < ZA (275 mm) < KA (376 mm) < HK (389 mm) < GH (460 mm) < PP (573 mm). MAAT showed a  
230 similar increase: LH ( $-5.7^{\circ}\text{C}$ ) < KA ( $-4.9^{\circ}\text{C}$ ) < ZA ( $-4.5^{\circ}\text{C}$ ) < HK ( $-3.2^{\circ}\text{C}$ ) < GH ( $-2.3^{\circ}\text{C}$ ) < PP ( $-2.5^{\circ}\text{C}$ ).

In the ZA Range, 1772 rock glaciers were found (intact=1606 and relict=166), of which 1472 rock glaciers have a talus origin,  
while 300 rock glaciers have a glacier origin (Fig. 6b). The rock glaciers cover an area of  $162\text{ km}^2$  (mean  $0.10\text{ km}^2$ ). Based on  
 $L_w$ , 1497 rock glaciers were classified as tongue-shaped, while 275 rock glaciers were classified as lobate (Fig. 6b). The  
average elevation of the rock glaciers in this range is 4518 m asl, the average slope is  $15.6^{\circ}$ , average  $L_w$  is 2.4, and the average  
235 PISR is  $524\text{ kWh m}^{-2}$  (Fig. 7). Climatically MAAT and precipitation of the rock glaciers were ranging from  $-9^{\circ}\text{C}$  to  $3^{\circ}\text{C}$  (mean  
 $-4.5^{\circ}\text{C}$ ) and 80 mm to 1106 mm (mean 275 mm), respectively (Fig. 7). In the ZA range, the majority 66% (1180) of the  
observed rock glaciers exhibit a north-facing aspect. Among this subset, 30% (535) were oriented directly towards the north,  
followed by 17% (311) northeast, and 19% (334) northwest. The remaining 34% 592 of rock glaciers displayed southerly  
orientation, with 12% (210) facing west, 7% (128) southwest, 5% (88) south, 6% (108) east, and 3% (58) southeast.

240 In HK, 1750 rock glaciers were found (intact=1606 and relict=166), of which 1461 rock glaciers have a talus origin, whereas  
289 rock glaciers have a glacier origin (Fig. 6a). The rock glaciers cover an area of  $162\text{ km}^2$  (mean  $0.10\text{ km}^2$ ). Based on  $L_w$ ,  
1518 rock glaciers were classified as tongue-shaped, whereas 232 rock glaciers were classified as lobate (Fig. 6a). The average  
elevation of rock glaciers in HK is 4399 m asl, the average slope is  $15^{\circ}$ , the average  $L_w$  is 2.7 m and the average PISR is  $523$   
 $\text{kWh m}^{-2}$  (Fig. 7). Climatically MAAT and precipitation of the rock glaciers were ranging from  $-9^{\circ}\text{C}$  to  $5^{\circ}\text{C}$  (mean  $-3^{\circ}\text{C}$ ) and  
245 79 mm to 1063 mm (mean 389 mm), respectively (Fig. 7). In the HK range, most rock glaciers 67% (1178) exhibit a north-  
facing aspect Among this subset, 34% (591) were oriented toward the north (N), followed by 17% (306) northeast, and 16%  
(281) northwest. The remaining 33% (572) of the rock glaciers have a non-northerly aspect, with 9% (167) west, followed by  
8% (135) southwest, 5% (90) south, 6% (104) east, and 4% (76) southeast.



In the LA Range, 684 rock glaciers were found (intact=616 and relict=68), of which 601 rock glaciers have a talus origin, whereas 83 rock glaciers have a glacier origin (Fig. 6c). The rock glaciers are spread over an area of 80 km<sup>2</sup> (mean 0.11 km<sup>2</sup>). Based on *L<sub>w</sub>*, 563 rock glaciers were classified as tongue-shaped, whereas 121 rock glaciers were classified as lobate (Fig. 6c). The average elevation of rock glaciers in LA range is 4864 m asl, the average slope is 15°, the average *L<sub>w</sub>* is 2.6 m and the average PISR is 530 kWh m<sup>-2</sup> (Fig. 7). Climatically MAAT and precipitation of the rock glaciers were ranging from -10 °C to 3 °C (mean -5°C) and 75 mm to 1060 mm (mean 197 mm), respectively (Fig. 7). In this range, most rock glaciers 61% (415) exhibit a north-facing aspect. Among this subset, 29% (199) are oriented toward the north, followed by 16% (109) northeast, and 16% (107) northwest. The remaining 39% (269) of the rock glaciers exhibit a non-northerly orientation, with 9% (64) facing west, followed by 7% (49) southwest, 6% (43) south, 8% (58) east, and 8% (55) southeast.

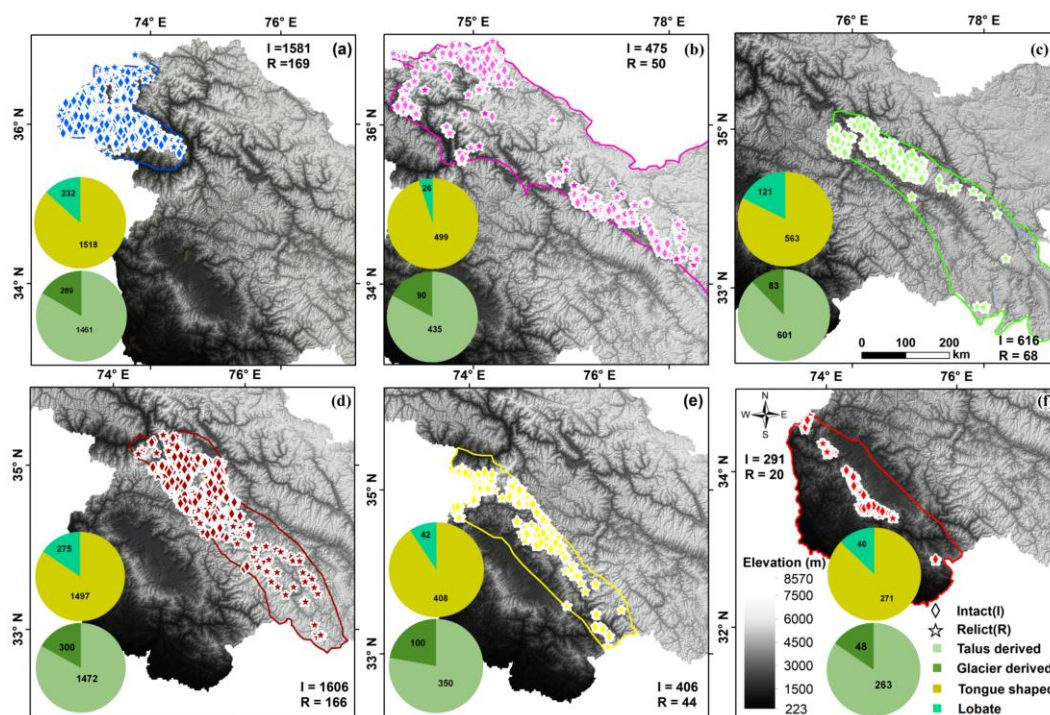

260 **Figure 6. Geographical distribution and current status of rock glaciers in various mountain ranges: (a) HK - Hindukush, (b) ZA - Zaskar range, (c) LA - Ladakh range, (d) KA - Karakorum range, (e) GH - Greater Himalaya Kashmir, and (f) PP-Pir Panjal range**

In the KA Range, 525 rock glaciers were found (intact=475 and relict=50), of which 435 rock glaciers have a talus origin, whereas 90 rock glaciers have glacier origin (Fig. 6d). The rock glaciers cover an area of 91 km<sup>2</sup> (mean 0.11 km<sup>2</sup>). Based on *L<sub>w</sub>*, 499 rock glaciers were classified as tongue-shaped, whereas 26 were classified as lobate (Fig. 6d). The average elevation of rock glaciers in this range is 4656 m asl, the average slope is 17°, the average *L<sub>w</sub>* is 3.6 m, and the average PISR is 474 kWh

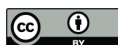

270  $m^{-2}$  (Fig. 7). Climatically MAAT and precipitation of the rock glaciers were ranging from  $-11.5^{\circ}C$  to  $3.5^{\circ}C$  (mean  $-5^{\circ}C$ ) and 71 mm to 1135 mm (mean 228 mm), respectively (Fig. 7). Most rock glaciers 45% (339) in this range exhibit a south-facing aspect. Among this subset, 21% (111) are south-oriented, followed by 14% (76) southwest, and 10% (52) southeast. The remaining 55% (186) of rock glaciers exhibit a non-southerly orientation, with 16% (86) facing north, followed by 11% (60) northeast, 10% (54) west, 9% (46) east, and 8% (40) northwest.

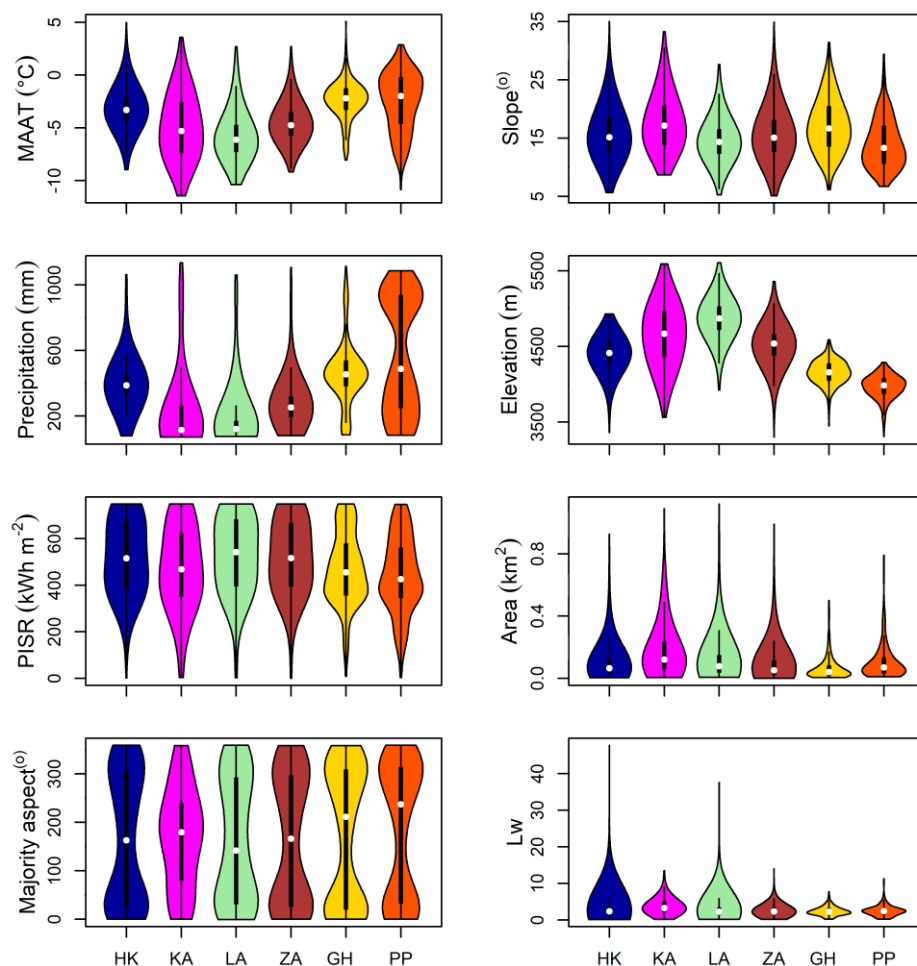

275 **Figure 7. Geographic, topographic, and climatic characteristics of the rock glaciers across different mountain ranges in the study area.**

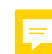

In the GH Range, 450 rock glaciers were found (intact=406 and relict=90), of which 350 rock glaciers have a talus origin, whereas 101 rock glaciers have a glacier origin (Fig. 6e). The rock glaciers cover an area of 30 km<sup>2</sup> (mean 0.06 km<sup>2</sup>). Based on *Lw*, 408 rock glaciers were classified as tongue-shaped, whereas 42 rock glaciers were classified as lobate (Fig. 6e). The



average elevation of rock glaciers in this range is 4158 m asl, the average slope is  $17.2^\circ$ , the average  $LW$  is 2.4 m and the average PISR is  $470 \text{ kWh m}^{-2}$  (Fig. 7). Climatically MAAT and precipitation of the rock glaciers were ranging from  $-8^\circ\text{C}$  to  $8^\circ\text{C}$  (mean  $-2^\circ\text{C}$ ) and 85 mm to 1113 mm (mean 460 mm), respectively (Fig. 7). In the GHK range, most of the observed rock glaciers 71% (320) exhibited a north-facing aspect. Among this subset, 36% (163) were oriented towards the north, followed by 13% (57) northeast, and 22% (100) northwest. The remaining 29% (130) of rock glaciers exhibited other orientations, with 10% (46) facing west, followed by 8% (38) southwest, 5% (21) south, 4% (20) east, and 1% (5) southeast.

285 **Table 2. Rock glacier inventory attribute data**

| Attribute name | Attribute Description                                                                                 | Attribute Unit                      |
|----------------|-------------------------------------------------------------------------------------------------------|-------------------------------------|
| FID            | Feature ID - Unique identifier for each feature assigned automatically.                               | Unitless                            |
| Shape          | Spatial geometry of a feature                                                                         | Unitless                            |
| RGID           | The RGID for each rock glacier was calculated from latitude and longitude                             | Unitless                            |
| AREA           | The total area of rock glacier                                                                        | Square kilometres ( $\text{km}^2$ ) |
| RG_CLASS       | Rock glacier class  | Intact or relict                    |
| SOURCE         | Talus-derived or glacier-derived                                                                      | Unitless                            |
| $LW_m$         | Length-to-width ratio (Manual measurement)                                                            | Unitless                            |
| $LW_a$         | Length-to-width ratio (Automatic measurement)                                                         | Unitless                            |
| RG_SHAPE       | Tongue-shaped and lobate                                                                              | Unitless                            |
| LAT            | Latitude of the centroid of the glacier                                                               | WGS84 Decimal degrees               |
| LONG           | Longitude of the centroid of the glacier                                                              | WGS84 Decimal degrees               |
| M_ASP          | Mean aspect – Average orientation of slope surfaces                                                   | Degrees                             |
| ELEV           | The mean elevation of a rock glacier                                                                  | m asl                               |
| MAX_ELV        | The maximum elevation of a rock glacier                                                               | m asl                               |
| MIN_ELV        | The minimum elevation of a rock glacier                                                               | m asl                               |
| SLOPE          | The mean slope of the glacier                                                                         | Degrees                             |
| M_RANGE        | Mountain ranges: HK, KA, LA, ZA, GHK, PP                                                              | Unitless                            |
| PISR           | Potential incoming solar radiation                                                                    | ( $\text{kWh m}^{-2}$ )             |
| MAAT           | Mean annual air temperature                                                                           | Degree Celsius                      |
| PPT            | Annual Average precipitation                                                                          | Millimetres                         |
| PERIM          | The total boundary length of a rock glacier (perimeter)                                               | Meters                              |
| ASP_CLASS      | Major aspect classes of a rock glacier (N, NE, E, SE, S, SW, W, NW)                                   | Unitless                            |



In the PP Range, 311 rock glaciers were found (intact=291 and relict=20), of which 263 rock glaciers have a talus origin, whereas 48 rock glaciers have a glacier origin (Fig. 6f). The rock glaciers cover an area of 33 km<sup>2</sup> (mean 0.10 km<sup>2</sup>). Based on *L<sub>w</sub>*, 271 rock glaciers were classified as tongue-shaped, whereas 40 were classified as lobate (Fig. 6f). The average elevation of the rock glaciers in this range is 3965 m asl, the average slope is 14°, the average *L<sub>w</sub>* is 2.5 m, and the average PISR is 444 kWh m<sup>-2</sup> (Fig. 7). Climatically MAAT and precipitation of the rock glaciers were ranging from -11 °C to 3 °C (mean -2.5 °C) and 82 mm to 1086 mm (mean 570 mm), respectively. In the PP range, majority of the observed rock glaciers 70% (221) exhibited a north-facing aspect (Fig. 7). Among this subset, 31% (99) were north-oriented, followed by 15% (47) northeast, and 24% (75) northwest. The remaining 30% (90) of the rock glaciers displayed other non-northerly orientations, with 13% (40) facing west, 7% (10), 3% south, 3% (9) east, and 2% (8) southeast.

#### 295 4 Discussion

The main aim of this study was to generate the first comprehensive rock glacier inventory for the study area and analyse their spatial distribution, morphometry, and potential influencing factors. These findings could contribute to a better understanding of rock glacier dynamics in the Himalayan region. The inventory consists of 5492 rock glaciers spread across diverse mountain ranges that exhibit varied geomorphic and climatic characteristics. The majority of rock glaciers (86%) were found to have talus origin, and the remaining rock glaciers (16 %) were glacier origin.

Rock glaciers were predominately found in the ZA mountain range, consisting of (32.2%), followed by HK (31.8%), LA (12.4%), KA (9.5%), GH (8.1%), and PP (6%). The HK and trans-Himalayan Mountain ranges (ZA, LA, and KA) are located at higher elevations (You et al., 2017; Schmidt and Nüsser, 2017) ensuring colder temperatures that favour the formation of rock glaciers. Dry climatic conditions with limited precipitation and low humidity preserve permafrost, prevent interstitial ice melting in rock glaciers, and maintain rock debris cohesion and rock glacier stability (Jorgenson et al., 2010). The trans-Himalayas possess a unique climatic phenomenon, as studied by Dahri et al. (2016), called rain shadowing, in which mountains act as barriers and intercept moisture-laden clouds, causing precipitation on the windward side. The leeward side experiences scanty precipitation, and the climate of these mountain ranges is cold and arid, which is favourable for the development of rock glaciers (Barsch, 1996). Similarly, other environmental factors, such as freeze-thaw cycles and steep slopes, enhance the weathering and disintegration of rocks into talus material, which in turn promotes the formation of talus rock glaciers. The results of our analysis show a definite and substantial link between lower MAAT values and the occurrence of rock glaciers in the study region. This indicates that cold temperatures play a crucial role in the formation and preservation of the rock glaciers. The average PISR values of the rock glaciers were highest in the ZA, followed by LA, HK, KA, GH, and PP. The lowest PISR values of GH and PP were due to the location of the majority of rock glaciers in the mountain valleys. The valleys receive little solar radiation, because the surrounding mountains shield sunlight for a significant portion of the day. Additionally, lower elevations in these ranges can lead to higher air pollution levels (Rashid et al., 2022), which further block sunlight and contribute to lower PISR values. Conversely, the high PISR in ZA and LA is primarily attributed to their high-



altitude locations, clear skies, and lesser air pollution. These factors could be responsible for the higher PISR values of rock glaciers in these mountain ranges.

320 Previous research in the Hindukush Himalayan region has consistently revealed the uniform elevation distribution patterns of rock glaciers across different mountain ranges. In the neighbouring Himachal Himalaya, the elevation range of the rock glaciers has been reported to be 3052-5503 m asl (Pandey, 2019), whereas it is slightly higher (3225-5675 m asl) in the Nepalese Himalaya (Jones et al., 2018). In the Karakorum region, the elevation range (3500-5500 m asl), particularly the lower limit, is the highest (Schmid et al., 2015). The present study identifies the location of rock glaciers between the elevation of 3300 m  
325 asl and 5605 m asl. By comparing these studies, it is evident that the elevation range of rock glaciers is fairly consistent across the mountain ranges along the Himalayan arc. The findings imply that the rock glaciers are typically located between 3300 m and 5605 m asl, which closely aligns with the elevation ranges proclaimed in the aforementioned studies. The heterogeneity of the elevation distribution of rock glaciers across these diverse Himalayan regions suggests climatic, topographical, and geological control. Furthermore, the analysis revealed that a significant proportion (64%) of the rock glaciers are oriented  
330 towards the northern aspect. The northern slope aspects generally receive less direct sunlight than the southern slope aspects which helps preserve ice and maintain the stability of the rock glaciers. These findings are consistent with those of previous studies conducted in the Hindukush Himalayan region (Jones et al., 2018; Wang et al., 2017).

#### 4.1. Inventory Validation

Field validation, ground-based surveys, and in situ measurements are valuable for validating the results to obtain more accurate  
335 measurements of rock glacier dimensions and internal structures, including length, width, and slope. However, it is extremely difficult to visit rock glaciers in remotely rugged topographic and climatic settings. Nevertheless, we performed an on-field validation of 10 rock glaciers in the PP range through extensive fieldwork campaigns (Fig. S3). The PP range lacks typical glaciers; instead, it hosts many rock glaciers, making it a crucial resource for downstream population. The inhabitants living in the lower regions rely on rock glaciers for the steady supply of water for drinking and irrigation. During field visits, the rock  
340 glaciers were physically examined, taking note of their morphological features such as the presence of ice, ice-mixed debris, and the overall shape and size of the landforms. This direct observation provides valuable insights and serves as a means of confirming the accuracy of the inventory. The comprehensive validation efforts undertaken through field visits and the use of satellite imagery have contributed to establishing the accuracy and reliability of the rock glacier inventory in the PP Range. The field observations were in close agreement with the digitised rock glaciers. This rigorous validation process ensures that  
345 the inventory is a robust resource for future research, management, and decision making related to rock glacier water reserves in the region. Further the error analysis revealed that the uncertainty associated with the cognitive aspects of delineating rock glacier inventory outlines is about 6% in the spatial extent of rock glaciers and digitisation error showed an error of 0.5%. According to the IPA Action Group (Delaloye et al., 2018), achieving 10% agreement is considered indicative of a strong





350 consensus. Therefore, the attained 6% variability underscores high-level agreement and quantifies the effectiveness of our approach associated with the rock glacier inventory (Fig. S2).

#### 4.2. Possible applications of the inventory

This comprehensive rock glacier inventory will provide a baseline data and first-hand knowledge regarding the distribution of permafrost to stakeholders, national and local disaster management authorities, border road organisation, and tourist development authorities. This will help them implement sustainable strategies and set up environment-friendly development and construction projects in fragile permafrost areas. Consequently, this proactive approach can play a significant role in preserving these periglacial environments, while promoting sustainable regional development by informing the policy makers about this less researched but important component of cryosphere. Integration of the rock glacier inventory of a region with environmental and climatic variables, such as precipitation, temperature, slope, aspect, and solar radiation, will enable the development of robust models for identifying and monitoring areas with potential permafrost (Boeckli et al., 2012). This inventory could also contribute to climate change research by providing data for modelling and simulations focused on assessing the impact of climate change on the distribution of permafrost. Furthermore, the inventory will provide valuable insights to water managers about the precise location and size of these features. This information could be important for the management of water resources, especially in arid and semi-arid regions, and could play a vital role in meeting the water demands of downstream areas and communities.

#### 365 5 Data Availability

Data described in this manuscript can be accessed at Zenodo under <https://doi.org/10.5281/zenodo.10559297> (Bhat et al., 2024).

#### 6 Conclusion

We present the first comprehensive rock glacier inventory for the western Himalayan regions of Jammu-Kashmir and Ladakh as on year 2023. The inventory encompasses 5492 rock glaciers covering an area of 573 km<sup>2</sup> and an average area of 0.1 km<sup>2</sup>. The rock glaciers are distributed across different mountain ranges with distinctive topographies and climatic conditions, with the highest proportion of rock glaciers in the ZA mountain range and the lowest in the PP range. It was found that 4973 rock glaciers are intact, and 511 are relict. The proportion of tongue-shaped rock glaciers is significantly higher (4756), whereas lobate-shaped are relatively less common accounting for 736 rock glaciers. The majority (83%) of rock glaciers have a talus origin, while the remaining (17%) rock glaciers have a glacial origin. Furthermore, the analysis revealed that 64% of the rock glaciers are oriented towards the northern aspect (N, NE, and NW). Topographically, rock glaciers are found within an elevation range of 3300-5606 m asl. It is pertinent to mention that the present study fills the research gap by providing information on the number, geographic distribution, and properties of rock glaciers in the western Himalaya, a region where



380 such data have been lacking. Additionally, this inventory of rock glaciers will serve as a foundation for future research focusing on permafrost and/or rock glacier dynamics, particularly with reference to the prevalent climate warming over the region. In addition, the inventory is potentially significant for policymakers, especially in arid and semi-arid areas, where rock glaciers play a crucial role in supplying water for both drinking and irrigation to communities living downstream.

### Supplementary information

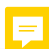

The supplement related to this article is available online at:

### 385 Author Contributions

Imtiyaz Ahmad Bhat wrote the first draft of the manuscript, performed analysis and executed R scripts. Irfan Rashid conceptualized the study and wrote a large part of the manuscript along with the first author. RAAJ Ramsankaran, Argha Banerjee and Saurabh Vijay modified the draft manuscript and provided constructive suggestions to improve the quality of the work. Irfan Rashid and RAAJ Ramsankaran jointly supervised the first author in generating this knowledge product.

### 390 Competing Interests

The authors declare that they have no conflict of interest.

### Acknowledgements

395 The research work was conducted as part of the Science and Engineering Research Board, Department of Science and Technology (SERB-DST), Government of India-sponsored Core Research Grant [CRG/2020/000053] titled “Permafrost distribution and dynamics over Jammu and Kashmir Himalaya from remote sensing, in-situ measurements and machine learning”. The financial assistance received from the Department under the project to accomplish this research is gratefully acknowledged.

### References

- 400 Allen, S. K., Schneider, D., and Owens, I. F.: First approaches towards modelling glacial hazards in the Mount Cook region of New Zealand’s Southern Alps, *Natural Hazards and Earth System Sciences*, 9, 481-499, <https://doi.org/10.5194/nhess-9-481-2009>, 2009.
- Azócar, G. F. and Brenning, A.: Hydrological and geomorphological significance of rock glaciers in the dry Andes, Chile (27°-33°s), *Permafrost and Periglacial Processes*, 21, 42-53, <https://doi.org/10.1002/ppp.669>, 2010.
- 405 Bajracharya SR, Shrestha, B. (eds): *The Status of Glaciers in the Hindu Kush–Himalayan Region*, Kathmandu: ICIMOD, <https://doi.org/10.53055/ICIMOD.551>, 2011.
- Baraka, S., Akera, B., Aryal, B., Sherpa, T., Shresta, F., Ortiz, A., Sankaran, K., Ferres, J. L., Matin, M., and Bengio, Y.: Machine learning for glacier monitoring in the Hindu Kush Himalaya, arXiv preprint arXiv:2012.05013, <https://doi.org/10.48550/arXiv.2012.05013>, 2020.



- Baral, P., Haq, M. A., and Yaragal, S.: Assessment of rock glaciers and permafrost distribution in Uttarakhand, India, Permafrost and Periglacial Processes, 31, 31–56, <https://doi.org/10.1002/ppp.2008>, 2020.
- Barsch, D.: Rockglaciers: indicators for the present and former geocology in high mountain environments, Berlin Heidelberg: Springer-Verlag, <https://doi.org/10.1007/978-3-642-80093-1>, 1996.
- Beniston, M., Farinotti, D., Stoffel, M., Andreassen, L. M., Coppola, E., Eckert, N., Fantini, A., Giacona, F., Hauck, C., Huss, M., Huwald, H., Lehning, M., López-Moreno, J. I., Magnusson, J., Marty, C., Morán-Tejeda, E., Morin, S., Naaim, M., Provenzale, A., Rabatel, A., Six, D., Stötter, J., Strasser, U., Terzago, S., and Vincent, C.: The European mountain cryosphere: a review of its current state, trends, and future challenges, The Cryosphere, 12, 759–794, <https://doi.org/10.5194/tc-12-759-2018>, 2018.
- Berthling, I., and Etzelmüller, B.: The concept of cryo-conditioning in landscape evolution, Quaternary Research, 75, 378–384, <https://doi.org/10.1016/j.yqres.2010.12.011>, 2011.
- Bhat, I., Rashid, I., Ramsankaran, R., Banerjee, A., and Vijay, S.: Rock glacier inventory for Jammu, Kashmir, and Ladakh, western Himalaya, India [Data set]. Zenodo. <https://doi.org/10.5281/zenodo.10559297>, 2024.
- Boeckli, L., Brenning, A., Gruber, S., and Noetzli, J.: Permafrost distribution in the European Alps: calculation and evaluation of an index map and summary statistics, The Cryosphere, 6, 807–820, <https://doi.org/10.5194/tc-6-807-2012>, 2012.
- Bolch, T., and Marchenko, S.: Significance of glaciers, rockglaciers and ice-rich permafrost in the Northern Tien Shan as water towers under climate change conditions, In: Braun, L. N., Hagg, W., Severskiy, I. V., and Young, G.: Assessment of Snow, Glacier and Water Resources in Asia: Selected papers from the Workshop in Almaty, Kazakhstan, 2006. Koblenz: IHP UNESCO, 132–144, <https://doi.org/10.5167/uzh-137250>, 2009.
- Brenning, A.: Benchmarking classifiers to optimally integrate terrain analysis and multispectral remote sensing in automatic rock glacier detection, Remote Sensing of Environment, 113, 239–247, <https://doi.org/10.1016/j.rse.2008.09.005>, 2009.
- Brighenti, S., Hotaling, S., Finn, D. S., Fountain, A. G., Hayashi, M., Herbst, D., Saros, J. E., Tronstad, L. M., and Millar, C. I.: Rock glaciers and related cold rocky landforms: Overlooked climate refugia for mountain biodiversity, Global Change Biology, 27, 1504–1517, <https://doi.org/10.1111/gcb.15510>, 2021.
- Buckel, J., Reinosch, E., Voigtländer, A., Dietze, M., Bücken, M., Krebs, N., Schroeckh, R., Mäusbacher, R., and Hördt, A.: Rock glacier characteristics under semiarid climate conditions in the western Nyainqêntanglha range, Tibetan Plateau, Journal of Geophysical Research: Earth Surface, 127, e2021JF006256, <https://doi.org/10.1029/2021JF006256>, 2022.
- Colucci, R. R., Boccali, C., Žebre, M., and Guglielmin, M.: Rock glaciers, protalus ramparts and pronival ramparts in the south-eastern Alps, Geomorphology, 269, 112–121, <https://doi.org/10.1016/j.geomorph.2016.06.039>, 2016.
- Dahri, Z. H., Ludwig, F., Moors, E., Ahmad, B., Khan, A., and Kabat, P.: An appraisal of precipitation distribution in the high-altitude catchments of the Indus basin, Science of the Total Environment, 548–549, 289–306, <https://doi.org/10.1016/j.scitotenv.2016.01.001>, 2016.



- 445 Delaloye, R., Barboux, C., Bodin, X., Brenning, A., Hartl, L., Hu, Y., Ikeda, A., Kaufmann, V., Kellerer-Pirklbauer, A.,  
Lambiel, C., Liu, L., Marcer, M., Rick, B., Scotti, R., Takadema, H., Trombotto, D., Vivero, S., and Winterberger,  
M.: Rock glacier inventories and kinematics: A new IPA Action Group (2018-2020), In: Proceedings of the 5th  
European Conference on Permafrost, Chamonix-Mont Blanc, France, 392–393,  
[https://bigweb.unifr.ch/Science/Geosciences/Geomorphology/Pub/Website/IPA/180628\\_EUCOP5\\_IPA\\_Action\\_Group\\_Delaloye.pdf](https://bigweb.unifr.ch/Science/Geosciences/Geomorphology/Pub/Website/IPA/180628_EUCOP5_IPA_Action_Group_Delaloye.pdf), 2018.
- Delaloye, R., Morard, S., Barboux, C., Abbet, D., Gruber, V., Riedo, M., and Gachet, S.: Rapidly moving rock glaciers in  
Mattertal, Mattertal, In Graf, C. (Ed.), Mattertal – ein Tal in Bewegung (pp. 21-31), Eidg. Forschungsanstalt für Wald,  
450 Schnee und Landschaft WSL, <https://www.dora.lib4ri.ch/wsl/islandora/object/wsl%3A11268>, 2013.
- Dhang, P. C.: Tunneling in lesser Himalaya, Jammu and Kashmir, India with special emphasis on tectonic mélangé, Journal  
of the Geological Society of India, 88, 593–602, <https://doi.org/10.1007/s12594-016-0525-3>, 2016.
- Dobiński, W.: The occurrence of permafrost within the glacial domain, Geosciences, 10,  
193, <https://doi.org/10.3390/geosciences10050193>, 2020.
- 455 Duguay, M. A., Edmunds, A., Arenson, L. U., and Wainstein, P. A.: Quantifying the significance of the hydrological  
contribution of a rock glacier—A review, In: Proceedings of the 68th Canadian Geotechnical Conference and 7th  
Canadian Permafrost Conference (GeoQuébec 2015), (p. 8), Richmond, BC, Canada: Canadian Geotechnical Society,  
[https://www.researchgate.net/profile/LukasArenson/publication/282402787\\_Quantifying\\_the\\_significance\\_of\\_the\\_hydrological\\_contribution\\_of\\_a\\_rock\\_glacier\\_A\\_review/links/560f651708aec422d1131a30/Quantifying-the-significance-of-the-hydrological-contribution-of-a-rock-glacier-A-review.pdf](https://www.researchgate.net/profile/LukasArenson/publication/282402787_Quantifying_the_significance_of_the_hydrological_contribution_of_a_rock_glacier_A_review/links/560f651708aec422d1131a30/Quantifying-the-significance-of-the-hydrological-contribution-of-a-rock-glacier-A-review.pdf), 2015.
- 460 Falaschi, D., Tadono, T., and Masiokas, M.: Rock glaciers in the patagonian andes: an inventory for the monte san lorenzo  
(cerro cochrane) massif, 47° s, Geografiska Annaler: Series A, Physical Geography, 97, 769–777,  
<https://doi.org/10.1111/geoa.12113>, 2015
- Fick, S. E. and Hijmans, R. J.: WorldClim 2: new 1-km spatial resolution climate surfaces for global land areas, International  
465 Journal of Climatology, 37, 4302–4315, <https://doi.org/10.1002/joc.5086>, 2017.
- Frey, H., Paul, F., and Strozzi, T.: Compilation of a glacier inventory for the western Himalayas from satellite data: methods,  
challenges, and results, Remote Sensing of Environment, 124, 832–843, <https://doi.org/10.1016/j.rse.2012.06.020>,  
2012.
- Gruber, S., Fleiner, R., Guegan, E., Panday, P., Schmid, M.-O., Stumm, D., Wester, P., Zhang, Y., and Zhao, L.: Inferring  
470 permafrost and permafrost thaw in the mountains of the Hindu Kush Himalaya region, The Cryosphere, 11, 81–99,  
<https://doi.org/10.5194/tc-11-81-2017>, 2017.
- Gupta, S.: Contesting conservation: shahtoosh trade and forest management in Jammu and Kashmir, India, Springer  
International Publishing AG, <http://doi.org/10.1007/978-3-319-72257-3>, 2018.



- 475 Haeberli, W., Hallet, B., Arenson, L., Elcinin, R., Humlum, O., Kääb, A., Kaufmann, V., Ladanyi, B., Matsuoka, N.,  
Springman, S., Mühlh, D. V.: Permafrost creep and rock glacier dynamics, *Permafrost and Periglacial Processes*, 17,  
189–214, <https://doi.org/10.1002/ppp.561>, 2006.
- Haeberli, W., Noetzli, J., Arenson, L., Delaloye, R., Gärtner-Roer, I., Gruber, S., Isaksen, K., Kneisel, C., Krautblatter, M.,  
and Phillips, M.: Mountain permafrost: development and challenges of a young research field, *Journal of Glaciology*,  
56, 1043-1058, <https://doi.org/10.3189/002214311796406121>, 2010.
- 480 Haeberli, W.: Creep of mountain permafrost: internal structure and flow of alpine rock glaciers, *Mitteilungen der*  
*Versuchsanstalt für Wasserbau, Hydrologie und Glaziologie, an der Eidgenössischen Technischen Hochschule*  
*Zürich*, Herausgegeben von Prof. Dr. D. Vischer, [https://ethz.ch/content/dam/ethz/special-](https://ethz.ch/content/dam/ethz/special-interest/baug/vaw/vaw-dam/documents/das-institut/mitteilungen/1980-1989/077.pdf)  
[interest/baug/vaw/vaw-dam/documents/das-institut/mitteilungen/1980-1989/077.pdf](https://ethz.ch/content/dam/ethz/special-interest/baug/vaw/vaw-dam/documents/das-institut/mitteilungen/1980-1989/077.pdf), 1985.
- Haeberli, W.: Mountain permafrost—research frontiers and a special long-term challenge, *Cold Regions Science and*  
485 *Technology*, 96, 71–76, <https://doi.org/10.1016/j.coldregions.2013.02.004>, 2013.
- Haq, M. A. and Baral, P.: Study of permafrost distribution in Sikkim Himalayas using Sentinel-2 satellite images and logistic  
regression modelling, *Geomorphology*, 333, 123–136, <https://doi.org/10.1016/j.geomorph.2019.02.024>, 2019.
- Hassan, J., Chen, X., Muhammad, S., and Bazai, N. A.: Rock glacier inventory, permafrost probability distribution modeling  
and associated hazards in the Hunza River Basin, Western Karakoram, Pakistan, *Science of The Total Environment*,  
490 782, 146833, <https://doi.org/10.1016/j.scitotenv.2021.146833>, 2021.
- Humlum, O.: The climatic significance of rock glaciers, *Permafrost and Periglacial Processes*, 9, 375–395,  
[https://doi.org/10.1002/\(SICI\)1099-1530\(199810/12\)9:4<375::AID-PPP301>3.0.CO;2-0](https://doi.org/10.1002/(SICI)1099-1530(199810/12)9:4<375::AID-PPP301>3.0.CO;2-0), 1998.
- Humlum, O.: The geomorphic significance of rock glaciers: estimates of rock glacier debris volumes and headwall recession  
rates in West Greenland, *Geomorphology*, 35, 41–67, [https://doi.org/10.1016/S0169-555X\(00\)00022-2](https://doi.org/10.1016/S0169-555X(00)00022-2), 2000.
- 495 Ikeda, A. and Matsuoka, N.: Degradation of talus-derived rock glaciers in the Upper Engadin, Swiss Alps, *Permafrost and*  
*Periglacial Processes*, 13, 145–161, <https://doi.org/10.1002/ppp.413>, 2002.
- Jafarov, E. E., Marchenko, S. S., and Romanovsky, V. E.: Numerical modeling of permafrost dynamics in Alaska using a high  
spatial resolution dataset, *The Cryosphere*, 6, 613–624, <https://doi.org/10.5194/tc-6-613-2012>, 2012.
- Janke, J. R., Bellisario, A. C., and Ferrando, F. A.: Classification of debris-covered glaciers and rock glaciers in the Andes of  
500 central Chile, 241, 98-121, <https://doi.org/10.1016/j.geomorph.2015.03.034>, 2015.
- Janke, J. R.: Colorado Front Range rock glaciers: distribution and topographic characteristics, *Arctic, Antarctic, and Alpine*  
*Research*, 39, 74–83, [https://doi.org/10.1657/1523-0430\(2007\)39\[74:CFRRGD\]2.0.CO;2](https://doi.org/10.1657/1523-0430(2007)39[74:CFRRGD]2.0.CO;2), 2007.
- Jee, V.: Vegetation of Jammu and Kashmir State: A General Account, In: Dar, G., Khuroo, A. (eds) *Biodiversity of the*  
*Himalaya: Jammu and Kashmir State*, *Topics in Biodiversity and Conservation*, vol 18, Springer, Singapore, pp. 167–  
505 190, [https://doi.org/10.1007/978-981-32-9174-4\\_7](https://doi.org/10.1007/978-981-32-9174-4_7), 2020.



- Johnson, G., Chang, H., and Fountain, A.: Active rock glaciers of the contiguous United States: geographic information system inventory and spatial distribution patterns, *Earth System Science Data*, 13, 3979–3994, <https://doi.org/10.5194/essd-13-3979-2021>, 2021.
- 510 Jones, D. B., Harrison, S., Anderson, K., and Whalley, W. B.: Rock glaciers and mountain hydrology: A review, *Earth-Science Reviews*, 193, 66–90, <https://doi.org/10.1016/j.earscirev.2019.04.001>, 2019.
- Jones, D. B., Harrison, S., Anderson, K., Selley, H. L., Wood, J. L., and Betts, R. A.: The distribution and hydrological significance of rock glaciers in the Nepalese Himalaya, *Global and Planetary Change*, 160, 123–142, <https://doi.org/10.1016/j.gloplacha.2017.11.005>, 2018.
- 515 Jones, D.: Rock Glaciers and Water Supplies in the Himalaya, Ph. D. Theses, University of Exeter, <https://ore.exeter.ac.uk/repository/handle/10871/120568>, 2020.
- Jorgenson, M. T., Romanovsky, V., Harden, J., Shur, Y., O'Donnell, J., Schuur, E. A. G., Kanevskiy, M., and Marchenko, S.: Resilience and vulnerability of permafrost to climate change, *Canadian Journal of Forest Research*, 40, 1219–1236, <https://doi.org/10.1139/X10-060>, 2010
- 520 Kääb, A., Strozzi, T., Bolch, T., Caduff, R., Trefall, H., Stoffel, M., and Kokarev, A.: Inventory and changes of rock glacier creep speeds in Ile Alatau and Kungöy Ala-Too, northern Tien Shan, since the 1950s, *The Cryosphere*, 15, 927–949, <https://doi.org/10.5194/tc-15-927-2021>, 2021.
- Kääb, A.: Remote sensing of permafrost-related problems and hazards, *Permafrost and Periglacial Processes*, 19, 107–136, <https://doi.org/10.1002/ppp.619>, 2008.
- 525 Karlsson, J. M., Lyon, S. W., and Destouni, G.: Thermokarst lake, hydrological flow and water balance indicators of permafrost change in Western Siberia, *Journal of Hydrology*, 464–465, 459–466, <https://doi.org/10.1016/j.jhydrol.2012.07.037>, 2012.
- Kaushik, S., Joshi, P. K., and Singh, T.: Development of glacier mapping in Indian Himalaya: A review of approaches, *International Journal of Remote Sensing*, 40, 6607–6634, <https://doi.org/10.1080/01431161.2019.1582114>, 2019.
- 530 Kellerer-Pirklbauer, A., Lieb, G. K., and Kleinfelchner, h.: A new rock glacier inventory of the Eastern European Alps, *Austrian Journal of Earth Sciences*, 105, 78–93, [https://www.ajes.at/images/AJES/archive/Band%20105\\_2/kellerer\\_at\\_al\\_ajes\\_105\\_2.pdf](https://www.ajes.at/images/AJES/archive/Band%20105_2/kellerer_at_al_ajes_105_2.pdf), 2012.
- Khan, M. A. R., Singh, S., Pandey, P., Bhardwaj, A., Ali, S. N., Chaturvedi, V., and Ray, P. K. C.: Modelling permafrost distribution in western himalaya using remote sensing and field observations, *Remote Sensing*, 13, 4403, <https://doi.org/10.3390/rs13214403>, 2021.
- 535 Kofler, C., Steger, S., Mair, V., Zebisch, M., Comiti, F., and Schneiderbauer, S.: An inventory-driven rock glacier status model (intact vs. relict) for South Tyrol, Eastern Italian Alps, *Geomorphology*, 350, 106887, <https://doi.org/10.1016/j.geomorph.2019.106887>, 2020.
- Krainer, K. and Ribis, M.: A rock glacier inventory of the Tyrolean Alps (Austria), *Austrian Journal of Earth Sciences*, 105, 32–47, [https://www.uibk.ac.at/projects/station-hintereis-opal-data/publications/pdf/krainer\\_ribis\\_ajes\\_105\\_2.pdf](https://www.uibk.ac.at/projects/station-hintereis-opal-data/publications/pdf/krainer_ribis_ajes_105_2.pdf), 2012.



- 540 Kulkarni, A. V., Rathore, B. P., and Singh, S. K.: Distribution of seasonal snow cover in central and western Himalaya, *Annals of Glaciology*, 51, 123–128, <https://doi.org/10.3189/172756410791386445>, 2010.
- Lilleøren, K. S. and Etzelmüller, B.: A regional inventory of rock glaciers and ice-cored moraines in Norway, *Geografiska Annaler: Series A, Physical Geography*, 93, 175–191, <https://doi.org/10.1111/j.1468-0459.2011.00430.x>, 2011.
- 545 Lilleøren, K. S., Etzelmüller, B., Gärtner-Roer, I., Kääh, A., Westermann, S., and Guðmundsson, Á.: The distribution, thermal characteristics and dynamics of permafrost in Tröllaskagi, northern Iceland, as inferred from the distribution of rock glaciers and ice-cored moraines, *Permafrost and Periglacial Processes*, 24, 322–335, <https://doi.org/10.1002/ppp.1792>, 2013.
- Liu, L., Millar, C. I., Westfall, R. D., and Zebker, H. A.: Surface motion of active rock glaciers in the Sierra Nevada, California, USA: inventory and a case study using InSAR, *The Cryosphere*, 7, 1109–1119, [https://doi.org/10.5194/tc-7-1109-](https://doi.org/10.5194/tc-7-1109-2013)  
550 [2013](https://doi.org/10.5194/tc-7-1109-2013), 2013.
- Majeed, Z., Mehta, M., Ahmad, M., and Mishra, R.: Active rock glaciers of Jhelum basin, Kashmir Himalaya, India, *Indian Journal of Geosciences*, 76, 107–124, [https://www.gsi.gov.in/webcenter/portal/OCBIS/pageQuickLinks/pageIndianJournal?Adf-Window-](https://www.gsi.gov.in/webcenter/portal/OCBIS/pageQuickLinks/pageIndianJournal?Adf-Window-Id=r0v3yjom6&Adf-Page-Id=0)  
[Id=r0v3yjom6&Adf-Page-Id=0](https://www.gsi.gov.in/webcenter/portal/OCBIS/pageQuickLinks/pageIndianJournal?Adf-Window-Id=r0v3yjom6&Adf-Page-Id=0), 2022.
- 555 Millar, C. I. and Westfall, R. D.: Rock glaciers and related periglacial landforms in the Sierra Nevada, CA, USA; inventory, distribution and climatic relationships, *Quaternary International*, 188, 90–104, <https://doi.org/10.1016/j.quaint.2007.06.004>, 2008.
- Pandey, A. C., Ghosh, T., Parida, B. R., Dwivedi, C. S., and Tiwari, R. K.: Modeling Permafrost Distribution Using Geoinformatics in the Alaknanda Valley, Uttarakhand, India. *Sustainability* 14, 15731, <https://doi.org/10.3390/su142315731>, 2022.
- 560 Pandey, P.: Inventory of rock glaciers in Himachal Himalaya, India using high-resolution Google Earth imagery, *Geomorphology*, 340, 103–115, <https://doi.org/10.1016/j.geomorph.2019.05.001>, 2019.
- Pandey, V. K., Kumar, R., Singh, R., Kumar, R., Rai, S. C., Singh, R. P., Tripathi, A. K., Soni, V. K., Ali, S. N., and Tamang, D.: Catastrophic ice-debris flow in the Rishiganga River, Chamoli, Uttarakhand (India), *Geomatics, Natural Hazards and Risk*, 13, 289–309, <https://doi.org/10.1080/19475705.2021.2023661>, 2022.
- 565 Rangecroft, S., Harrison, S., Anderson, K., Magrath, J., Castel, A. P., and Pacheco, P.: A first rock glacier inventory for the Bolivian Andes, *Permafrost and Periglacial Processes*, 25, 333–344, <https://doi.org/10.1002/ppp.1816>, 2014.
- Rashid, I., Bhat, I. A., Najar, N. A., Kang, S., Jan, F. Z., Dar, S. A., Bhat, S. U., Kashani, S. D. R., and Rasool, W.: Aerosol variability and glacial chemistry over the western Himalayas, *Environmental Chemistry*, 19, 312–327, <https://doi.org/10.1071/EN22022>, 2022.
- 570 Roer, I. and Nyenhuis, M.: Rockglacier activity studies on a regional scale: comparison of geomorphological mapping and photogrammetric monitoring, *Earth Surface Processes and Landforms*, 32, 1747–1758, <https://doi.org/10.1002/esp.1496>, 2007.



- 575 Romanovsky, V. E., Smith, S. L., and Christiansen, H. H.: Permafrost thermal state in the polar Northern Hemisphere during  
the international polar year 2007–2009: a synthesis, *Permafrost and Periglacial processes*, 21, 106–116,  
<https://doi.org/10.1002/ppp.689>, 2010.
- Romshoo, S. A., Rashid, I., Altaf, S., and Dar, G. H.: Jammu and Kashmir State: An Overview. In: Dar, G., Khuroo, A. (eds)  
Biodiversity of the Himalaya: Jammu and Kashmir State, *Topics in Biodiversity and Conservation*, vol 18, vol. 18,  
edited by: Dar, G. H. and Khuroo, A. A., Springer Singapore, Singapore, 129–166, [https://doi.org/10.1007/978-981-](https://doi.org/10.1007/978-981-32-9174-4_6)  
580 [32-9174-4\\_6](https://doi.org/10.1007/978-981-32-9174-4_6), 2020.
- Sattler, K. and Sattler, K.: An Estimate of Alpine Permafrost Distribution in the Southern Alps, In: *Periglacial Preconditioning  
of Debris Flows in the Southern Alps, New Zealand*, Springer Theses, Springer Cham, 77–155,  
[https://doi.org/10.1007/978-3-319-35074-5\\_4](https://doi.org/10.1007/978-3-319-35074-5_4), 2016.
- Schmid, M.-O., Baral, P., Gruber, S., Shahi, S., Shrestha, T., Stumm, D., and Wester, P.: Assessment of permafrost distribution  
585 maps in the Hindu Kush Himalayan region using rock glaciers mapped in Google Earth, *The Cryosphere*, 9, 2089–  
2099, <https://doi.org/10.5194/tc-9-2089-2015>, 2015.
- Schmidt, S. and Nüsser, M.: Changes of high altitude glaciers in the Trans-Himalaya of Ladakh over the past five decades  
(1969–2016), *Geosciences*, 7, 27, <https://doi.org/10.3390/geosciences7020027>, 2017.
- Schoeneich, P., Bodin, X., Echelard, T., Kaufmann, V., Kellerer-Pirklbauer, A., Krysiecki, J.-M., and Lieb, G. K.: Velocity  
590 changes of rock glaciers and induced hazards, In: Lollino, G., Manconi, A., Clague, J., Shan, W., Chiarle, M. (eds)  
*Engineering Geology for Society and Territory-Volume 1*, Springer Cham, pp. 223–227, [https://doi.org/10.1007/978-](https://doi.org/10.1007/978-3-319-09300-0_42)  
[3-319-09300-0\\_42](https://doi.org/10.1007/978-3-319-09300-0_42), 2015.
- Scotti, R., Brardinoni, F., Alberti, S., Frattini, P., and Crosta, G. B.: A regional inventory of rock glaciers and protalus ramparts  
in the central Italian Alps, *Geomorphology*, 186, 136–149, <https://doi.org/10.1016/j.geomorph.2012.12.028>, 2013.
- 595 Stiegler, C., Johansson, M., Christensen, T. R., Mastepanov, M., and Lindroth, A.: Tundra permafrost thaw causes significant  
shifts in energy partitioning, *Tellus B: Chemical and Physical Meteorology*, 68, 30467,  
<https://doi.org/10.3402/tellusb.v68.30467>, 2016.
- Stuenzi, S. M., Boike, J., Cable, W., Herzs Schuh, U., Kruse, S., Pestryakova, L. A., von Deimling, T. S., Westermann, S.,  
Zakharov, E. S., and Langer, M.: Variability of the surface energy balance in permafrost-underlain boreal forest,  
600 *Biogeosciences*, 18, 343–365, <https://doi.org/10.5194/bg-18-343-2021>, 2021.
- Thayyen, R. J. and Gergan, J. T.: Role of glaciers in watershed hydrology: a preliminary study of a "Himalayan catchment",  
*The Cryosphere*, 4, 115–128, <https://doi.org/10.5194/tc-4-115-2010>, 2010.
- Wang, X., Liu, L., Zhao, L., Wu, T., Li, Z., and Liu, G.: Mapping and inventorying active rock glaciers in the northern Tien  
Shan of China using satellite SAR interferometry, *The Cryosphere*, 11, 997–1014, [https://doi.org/10.5194/tc-11-997-](https://doi.org/10.5194/tc-11-997-2017)  
605 [2017](https://doi.org/10.5194/tc-11-997-2017), 2017.





You, Q.-L., Ren, G.-Y., Zhang, Y.-Q., Ren, Y.-Y., Sun, X.-B., Zhan, Y.-J., Shrestha, A. B., and Krishnan, R.: An overview of studies of observed climate change in the Hindu Kush Himalayan (HKH) region, *Advances in Climate Change Research*, 8, 141–147, <https://doi.org/10.1016/j.accr.2017.04.001>, 2017.
